# Supplementary material for: The Anti-Acne Potential and Chemical Composition of Two Cultivated Cotoneaster Species
Source: MDPI journal article supplement (doi:10.3390/cells11030367), 2022-01-21
Supplement: s1 [file s1]

# Supplementary Materials

**Table S1.** Zones of bacterial growth inhibition of the *Cotoneaster* extracts and fractions.

| Sample | <i>C. acnes</i><br>PCM<br>2334 | <i>C. acnes</i><br>PCM<br>2400 | <i>C. acnes</i><br>ATCC<br>11827 | <i>C. granulosum</i><br>PCM<br>2462 | <i>S. aureus</i><br>ATCC<br>25923 | <i>S. epidermidis</i><br>ATCC<br>12228 | <i>P. aeruginosa</i><br>ATCC<br>27853 | <i>E. coli</i><br>ATCC<br>25992 |
|--------|--------------------------------|--------------------------------|----------------------------------|-------------------------------------|-----------------------------------|----------------------------------------|---------------------------------------|---------------------------------|
| CHi    | 12 ± 1                         | 11 ± 3                         | 10 ± 3                           | 6 ± 1                               | 8 ± 2                             | 6 ± 1                                  | 0                                     | 0                               |
| CHs    | 10 ± 2                         | 12 ± 2                         | 12 ± 2                           | 6 ± 2                               | 10 ± 2                            | 6 ± 2                                  | 0                                     | 0                               |
| CHs-1  | 15 ± 2                         | 15 ± 1                         | 14 ± 3                           | 14 ± 3 <sup>a,b</sup>               | 13 ± 2                            | 12 ± 2 <sup>a,b</sup>                  | 0                                     | 0                               |
| CHs-2  | 20 ± 2 <sup>a,b</sup>          | 23 ± 1 <sup>a,b,c</sup>        | 22 ± 1 <sup>a,b,c</sup>          | 21 ± 1 <sup>a,b</sup>               | 17 ± 2 <sup>a,b</sup>             | 19 ± 1 <sup>a,b,c</sup>                | 0                                     | 0                               |
| CHs-3  | 14 ± 3 <sup>d</sup>            | 11 ± 3 <sup>d</sup>            | 12 ± 3 <sup>d</sup>              | 13 ± 2 <sup>a,b</sup>               | 6 ± 3 <sup>c,d</sup>              | 8 ± 2 <sup>d</sup>                     | 0                                     | 0                               |
| CHs-4  | 16 ± 1 <sup>b</sup>            | 18 ± 3 <sup>a</sup>            | 19 ± 3 <sup>a</sup>              | 17 ± 2 <sup>a,b</sup>               | 17 ± 3 <sup>a,b,e</sup>           | 15 ± 1 <sup>a,b,e</sup>                | 0                                     | 0                               |

Statistical analysis: a—significantly different results compared to CHi; b—significantly different results compared to CHs; c—significantly different results compared to CHs-1; d—significantly different results compared to CHs-2; e—significantly different results compared to CHs-3; One-Way ANOVA test, followed by a Tukey's multiple comparison test,  $p < 0.05$ . CHi—crude extract of *C. hissaricus*, CHs—crude extract of *C. hsingshangensis*, CHs-1—water fraction of *C. hsingshangensis*, CHs-2—diethyl ether fraction of *C. hsingshangensis*, CHs-3—butanol fraction of *C. hsingshangensis*, CHs-4—ethyl acetate fraction of *C. hsingshangensis*.
